# Supplementary material
Source: PubMed Central journal article supplement (PMC3811744)
Supplement: IAI.00282-13_zii999090334so1.pdf [file IAI.00282-13_zii999090334so1.pdf]

## Supplemental Figures

**Figure S1.** For quality control, H37Rv was grown in two different laboratories. Heat-killed, bead-disrupted lysates of the two stocks were used to stimulate PBMCs of four donors. RPMI and heat-killed *Candida* hyphae were used as controls. Below the mean and standard deviation are shown for A) IL-1 $\beta$  (after 24h stimulation), B) TNF- $\alpha$  (24h), C) IL-6 (24h), D) IFN- $\gamma$  (48h), E) IL-10 (48h) and F) IL-17 (7 days). The results are comparable for the stock from the Dutch National TB Reference Centre (shown in red) and Leiden University Medical Centre (blue).

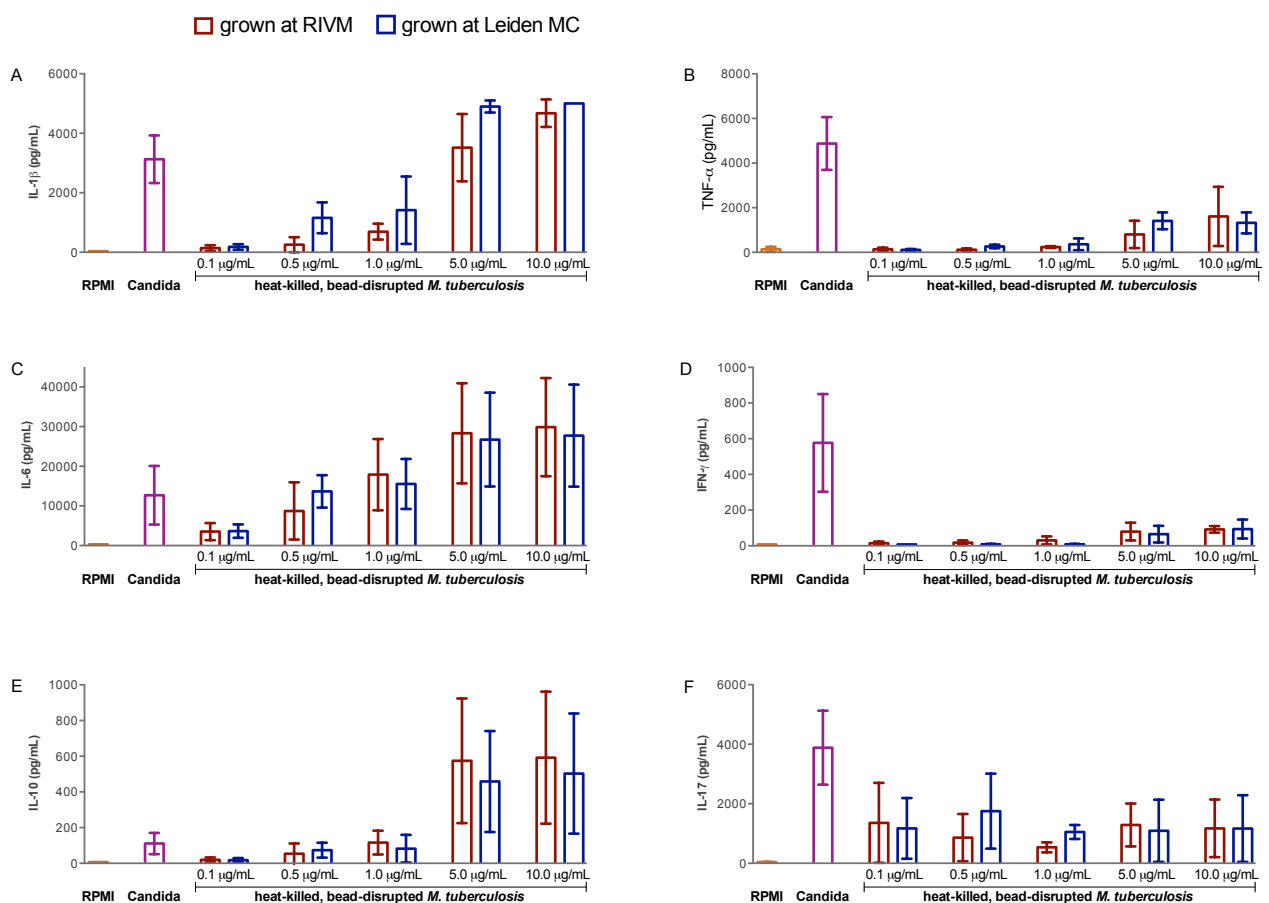

**Figure S2.** IFN- $\gamma$  response of ten healthy donors to modern and ancient Beijing and to Euro-American reactivation strains. A) strain-associated differences in cytokine production. B) donor-associated differences in cytokine production for modern and ancient Beijing strains, for all ten donors individually.

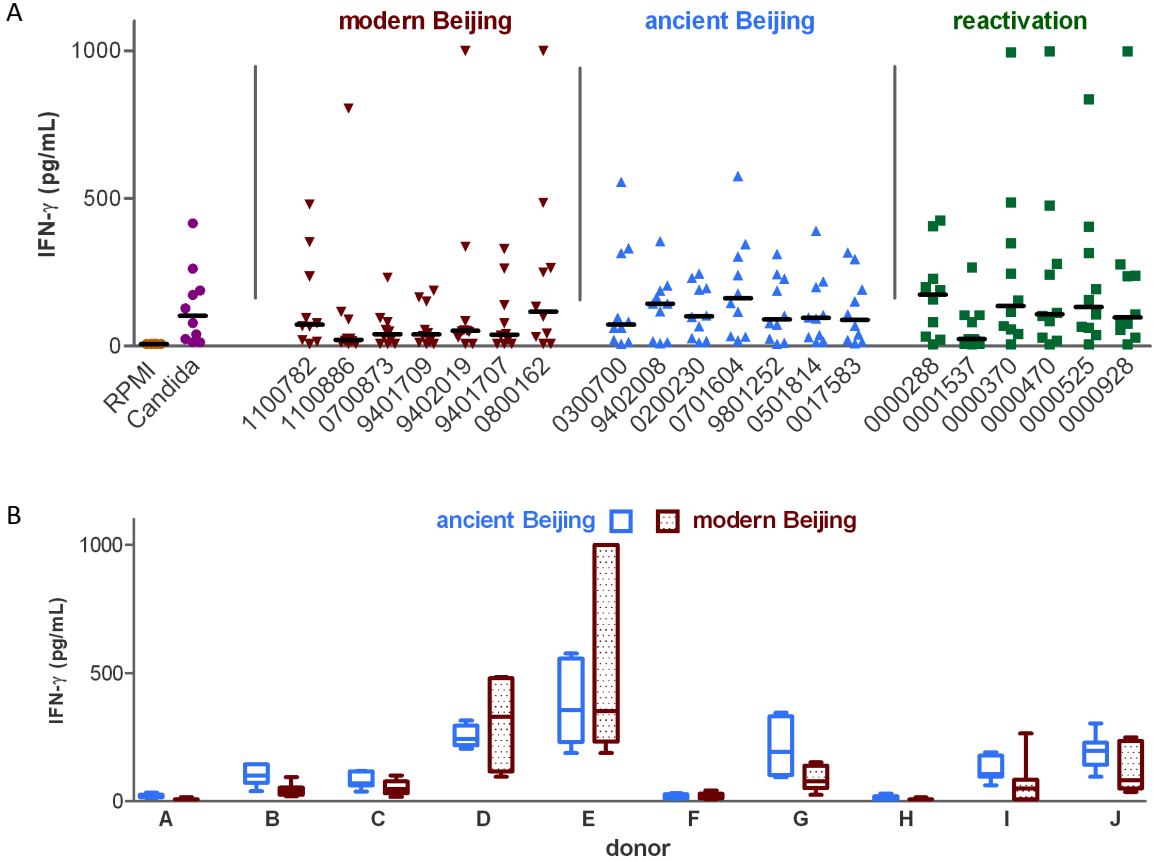

**Figure S3.** TNF- $\alpha$  response of ten healthy donors to modern and ancient Beijing and to Euro-American reactivation strains. A) strain-associated differences in cytokine production. B) donor-associated differences in cytokine production for modern and ancient Beijing strains, for all ten donors individually.

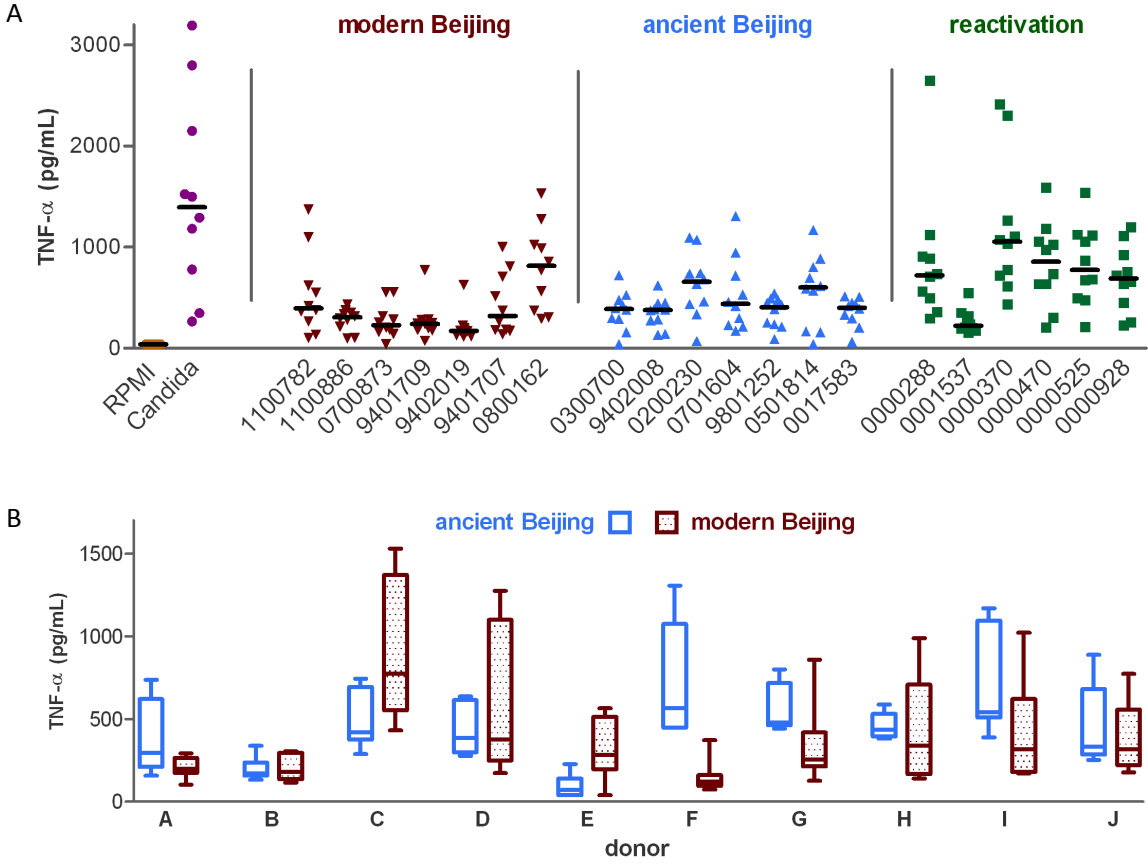

**Figure S4.** IL-1Ra response of ten healthy donors to modern and ancient Beijing and to Euro-American reactivation strains. A) strain-associated differences in cytokine production (measurement in *Candida* stimulated samples was not performed). B) donor-associated differences in cytokine production for modern and ancient Beijing strains, for all ten donors individually.

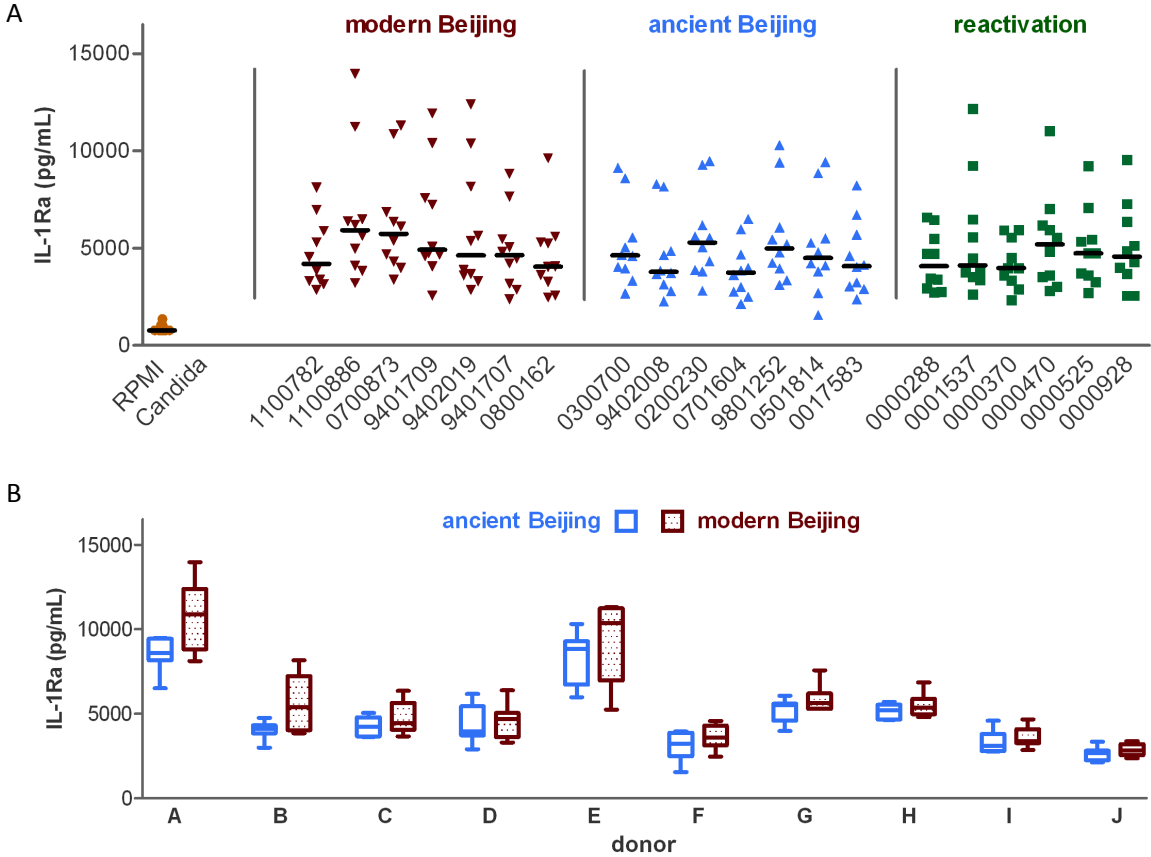

**Figure S5.** TGF- $\beta$  response of ten healthy donors to modern and ancient Beijing and to Euro-American reactivation strains. A) strain-associated differences in cytokine production (measurement in *Candida* stimulated samples was not performed). B) donor-associated differences in cytokine production for modern and ancient Beijing strains, for all ten donors individually.

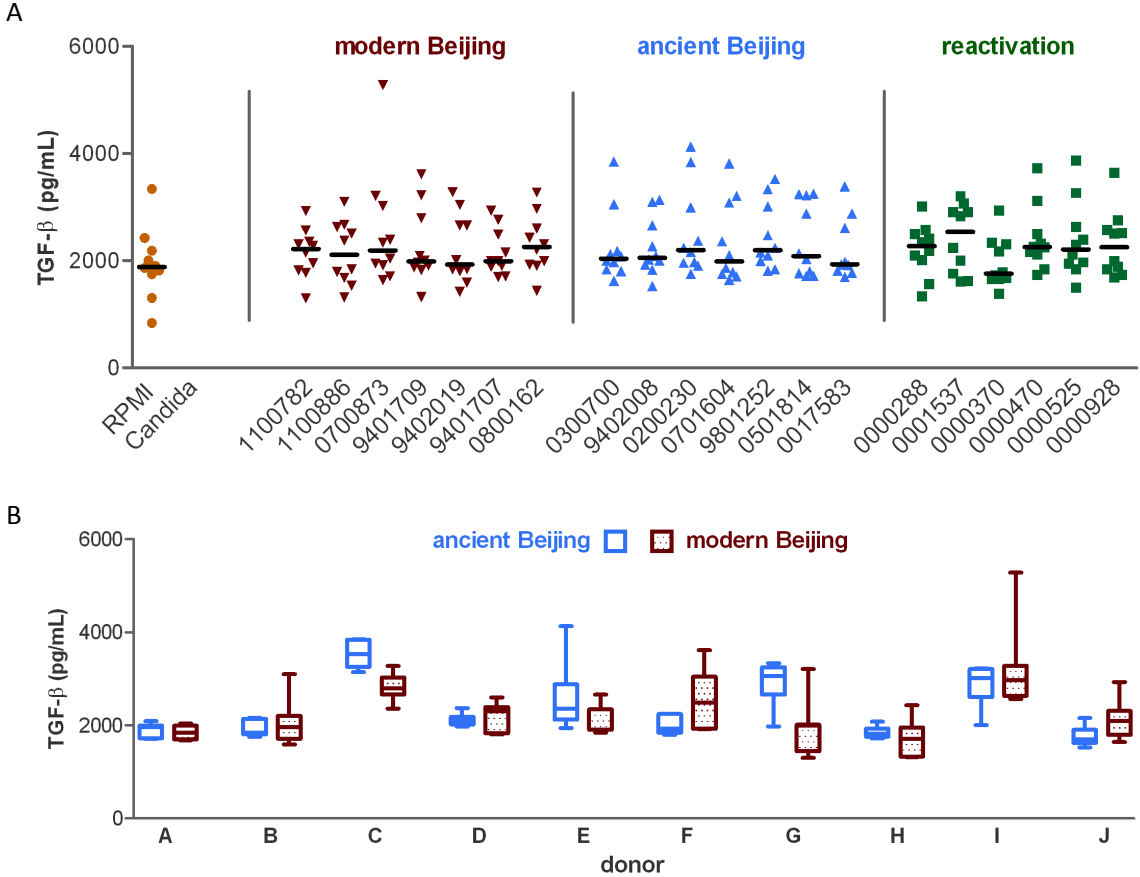

**Figure S6.** IL-10 response of ten healthy donors to modern and ancient Beijing and to Euro-American reactivation strains. A) strain-associated differences in cytokine production. B) donor-associated differences in cytokine production for modern and ancient Beijing strains, for all ten donors individually.

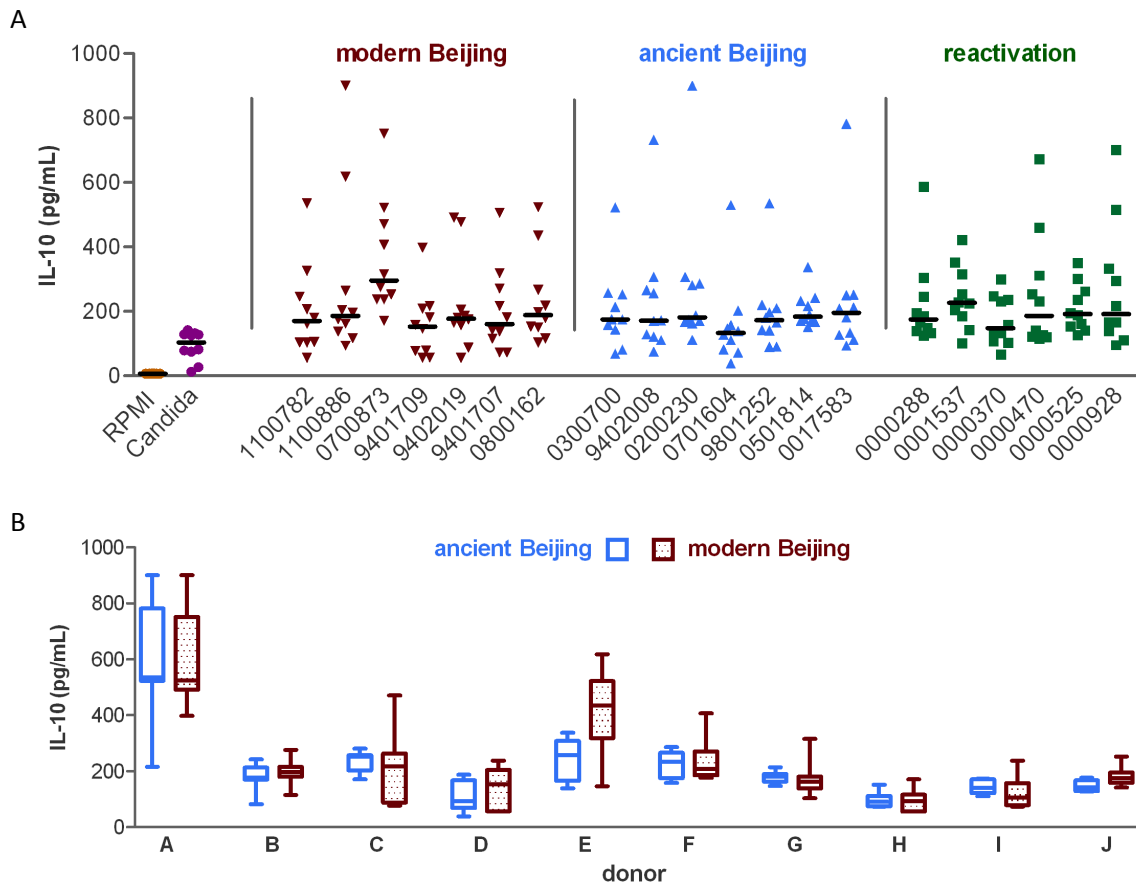

**Figure S7.** IL-6 response of ten healthy donors to modern and ancient Beijing and to Euro-American reactivation strains. A) strain-associated differences in cytokine production. B) donor-associated differences in cytokine production for modern and ancient Beijing strains, for all ten donors individually.

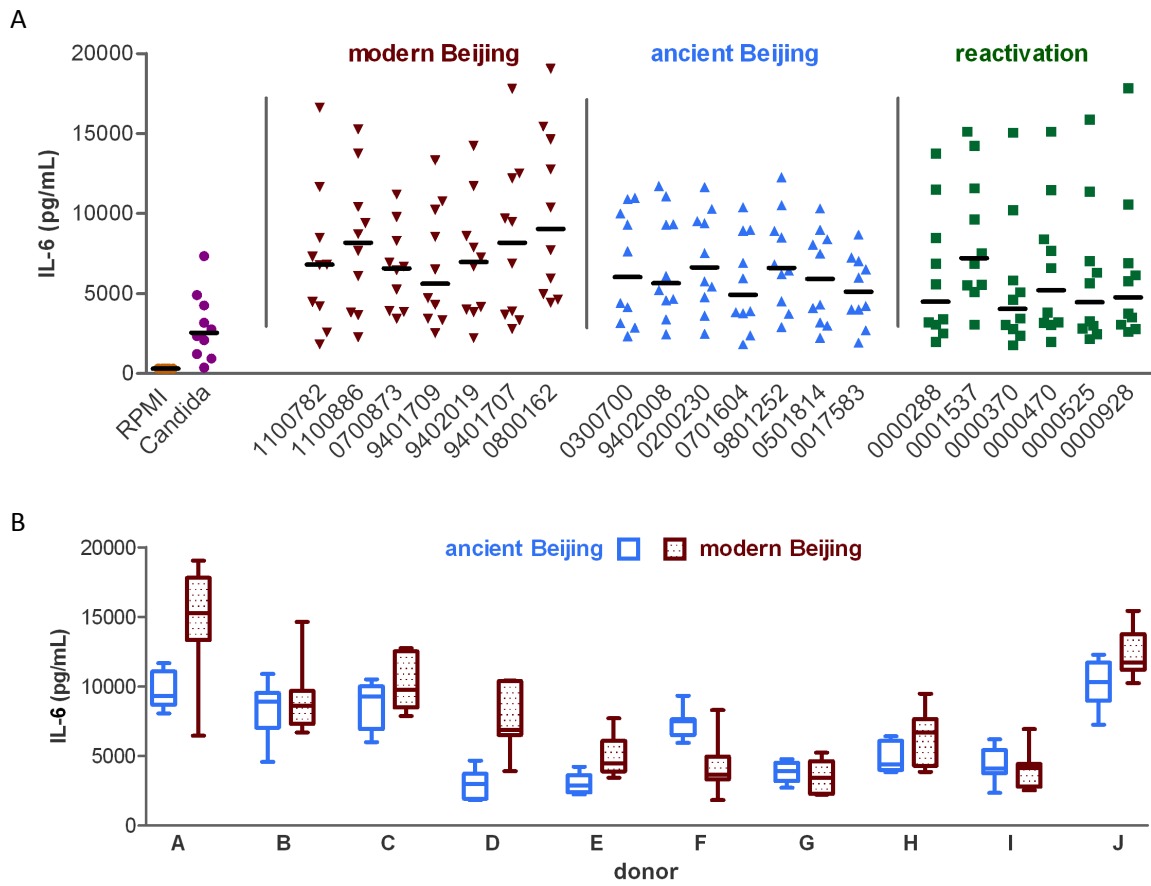

**Figure S8.** IL-17 response of ten healthy donors to modern and ancient Beijing and to Euro-American reactivation strains. A) strain-associated differences in cytokine production. B) donor-associated differences in cytokine production for modern and ancient Beijing strains, for all ten donors individually.

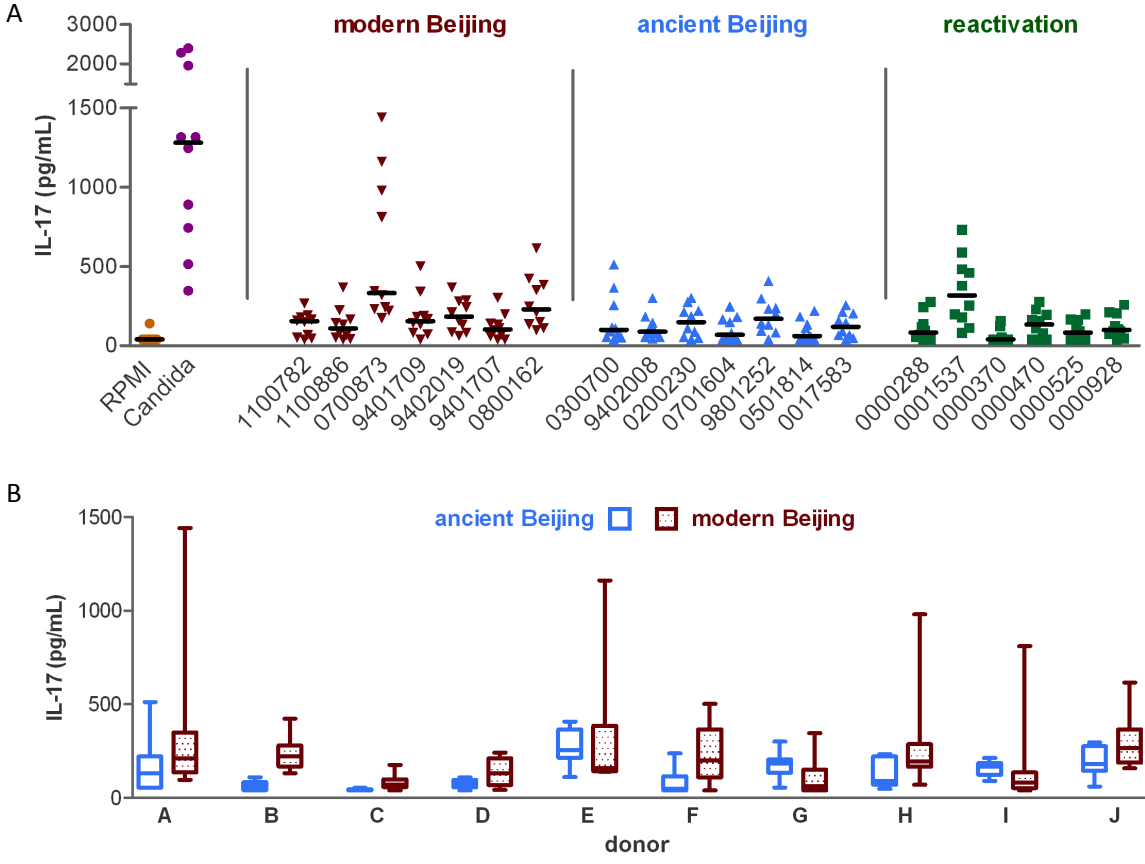



**Figure S9.** IL-22 response of ten healthy donors to modern and ancient Beijing and to Euro-American reactivation strains. A) strain-associated differences in cytokine production. B) donor-associated differences in cytokine production for modern and ancient Beijing strains, for all ten donors individually.

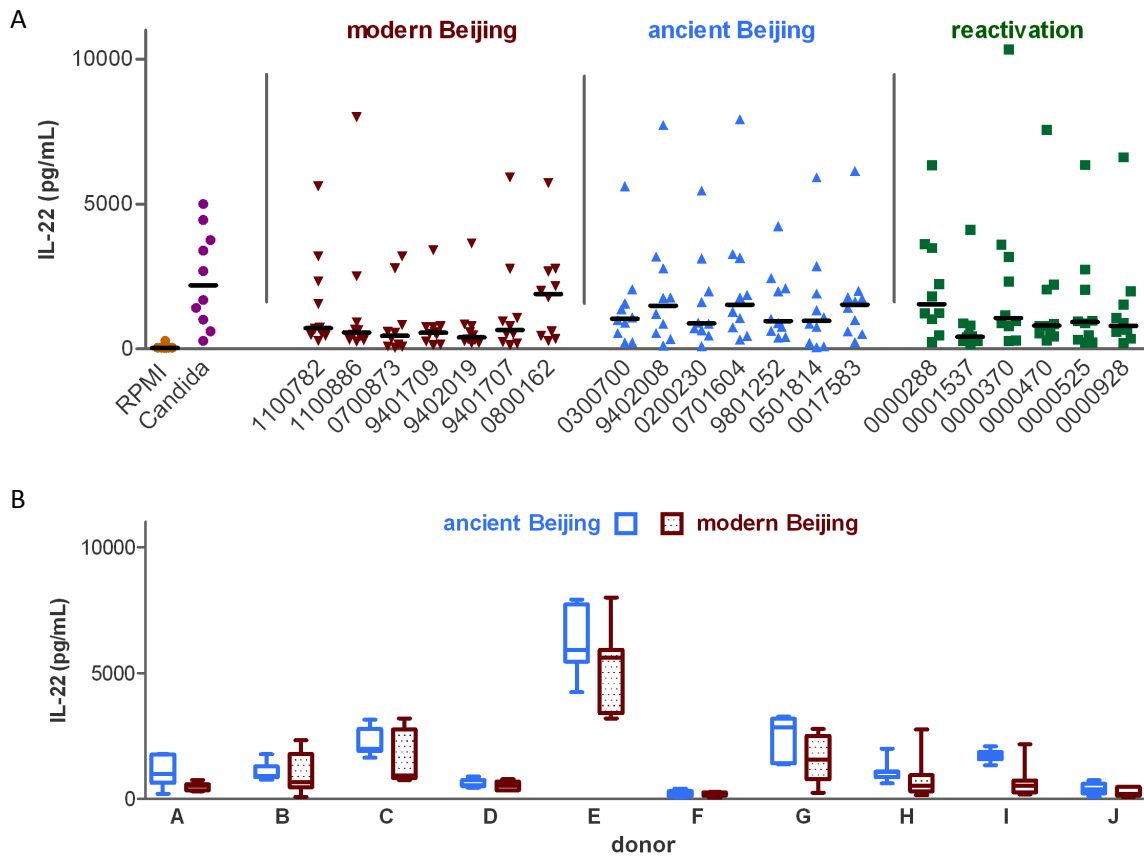

< end >
